## Prospective study on factors affecting the prognosis of oral cancer in a Chinese population

Fengqiong Liu<sup>1</sup>, Fa Chen<sup>1</sup>, Jiangfeng Huang<sup>1</sup>, Lingjun Yan<sup>1</sup>, Fangping Liu<sup>1</sup>, Junfeng Wu<sup>1</sup>, Yu Qiu<sup>2</sup>, Xiaoyan Zheng<sup>2</sup>, Rongzhao Zhang<sup>1</sup>, Lisong Lin<sup>2</sup>, Baochang He<sup>1</sup>

<sup>1</sup>Department of Epidemiology and Health Statistic, Fujian Provincial Key Laboratory of Environment factors and Cancer, School of Public Health, Fujian Medical University, Fujian, China

<sup>2</sup>Department of Stomatology, The First Affiliated Hospital of Fujian Medical University, Fujian, China

**Correspondence to:** Baochang He, **email:** hbc517@163.com  
Lisong Lin, **email:** Dr\_lsling@126.com

**Keywords:** oral cancer, prognosis, BMI, chemotherapy, radiotherapy

**Received:** August 01, 2016

**Accepted:** December 01, 2016

**Published:** December 09, 2016

### ABSTRACT

**This study was performed to identify the factors affecting prognosis of oral cancer patients. 1240 pathologically confirmed oral cancer patients were included. The sociodemographic and clinical characteristics of all patients were collected. Univariate and multivariate Cox proportional hazards models were used to assess potential prognostic factors for survival. 1240 oral cancer patients were followed up for 49235.00 person months, and the 5-year overall survival rate was 64.38%. Both univariate and multivariate Cox regression analysis indicated that Body Mass Index < 18.5 kg/m<sup>2</sup> (vs 18.5–23.9 kg/m<sup>2</sup>), age ≥ 55 years (vs < 55 years), clinical stages of II-IV (vs stage I), and poor differentiation (vs well differentiation) were associated with worse survival of oral cancer patients. While surgery (vs non-surgery) and origin of urban area (vs rural area) were protective factors. However, no significant association was found between adjuvant therapy and survival in oral cancer patients.**

### INTRODUCTION

Oral cancer is the most common cancer among head and neck carcinomas, which is becoming a major health problem particularly in developing countries [1]. According to recent data from the National Central Cancer Registry of China, the age-standardized rates of oral cancer in the Chinese population were 2.22/100,000 in 2011 and data shows that there is an increasing tendency in the incidence [2]. Moreover, the prognosis of oral cancer was not significantly improved in the past decades, a relative overall survival rate of 81.7, 61.7 and 54.9% at 1, 3 and 5 years, respectively in the US [3].

Despite being heavily influenced by age, tumor stage, sites, and histological grading, the survival rate of oral cancer patients is influenced by many other factors such as the time between disease and perception, related treatment, access to health-care services, educational levels and occupation of the patients, behavioral/cultural factors, exposure to risk factors such as chewing tobacco [4–8].

Although several studies evaluated the influence of these social factors on survival rate of oral cancer, most of the studies do not make proper assessments considering the

potential confounding factors or with limited sample size. Thus far, large scale prospective study about prognosis of oral cancer in China was still absent. The objective of this study is to determine whether clinical features, histopathology, and socio-economic status will influence the survival of patients with oral cancer in Southeast China.

### RESULTS

#### The clinicopathological characteristics and overall survive rate of oral cancer patients

795 males and 445 females (1.78:1) were included in the analysis with a median age of 57 years old. As shown in Table 1, there were 464 (43.9%) early stage (I–II) and 593(56.1%) advanced (III–IV) oral cancer patients. Well differentiated tumors were observed in 472 (46.5%) patients, moderately differentiated tumors in 410 (40.1%) patients, poorly differentiated tumors in 134 (13.2%) patients. For all the 1240 patients, 144 patients (11.6%) did not receive surgery. Among the 1096 patients who undertook surgery, 390 patients (35.6%) received surgery alone, 236 patients (21.5%) received surgery and

**Table 1: Results of univariate analysis of prognostic factors for survival in oral cancer**

| Characteristic           | Number of Censored (%) | Number of death (%) | 5-year survival rate (%) | log-rank P | HR (95% CI)      |
|--------------------------|------------------------|---------------------|--------------------------|------------|------------------|
| Gender                   |                        |                     |                          |            |                  |
| male                     | 520 (60.82)            | 275 (71.43)         | 61.78                    | < 0.001    | 1.00             |
| female                   | 335 (39.18)            | 110 (28.57)         | 69.18                    |            | 0.67 (0.54,0.84) |
| Age                      |                        |                     |                          |            |                  |
| < 55                     | 379 (44.33)            | 136 (35.32)         | 69.51                    | < 0.001    | 1.00             |
| ≥ 55                     | 476 (55.67)            | 249 (64.68)         | 60.74                    |            | 1.52 (1.23,1.87) |
| BMI (kg/m <sup>2</sup> ) |                        |                     |                          |            |                  |
| 18.5–23.9                | 516 (60.35)            | 231 (60.00)         | 65.23                    | 0.006      | 1.00             |
| < 18.5                   | 130 (15.20)            | 83 (21.56)          | 52.47                    |            | 1.37 (1.06,1.76) |
| ≥ 24                     | 209 (24.45)            | 71 (18.44)          | 71.34                    |            | 0.83 (0.64,1.09) |
| Occupation               |                        |                     |                          |            |                  |
| farmer                   | 301 (35.20)            | 192 (49.87)         | 61.16                    | 0.014      | 1.00             |
| worker                   | 166 (19.42)            | 85 (22.08)          | 66.55                    |            | 0.81 (0.62,1.04) |
| office worker            | 388 (45.38)            | 108 (28.05)         | 67.41                    |            | 0.71 (0.56,0.90) |
| Origin                   |                        |                     |                          |            |                  |
| rural area               | 476 (55.67)            | 239 (62.08)         | 61.90                    | 0.028      | 1.00             |
| urban area               | 371 (43.39)            | 143 (37.14)         | 67.42                    |            | 0.77 (0.62,0.94) |
| Education                |                        |                     |                          |            |                  |
| none                     | 63 (7.88)              | 20 (5.54)           | 72.37                    | 0.114      | 1.00             |
| ≤ 9 years                | 584 (73.09)            | 302 (83.66)         | 62.83                    |            | 1.11 (0.70,1.74) |
| > 9 years                | 152 (19.03)            | 39 (10.80)          | 71.32                    |            | 0.73 (0.42,1.26) |
| Family history           |                        |                     |                          |            |                  |
| no                       | 831 (97.19)            | 371 (96.36)         | 64.09                    | 0.882      | 1.00             |
| yes                      | 24 (2.81)              | 14 (3.64)           | 71.20                    |            | 1.04 (0.61,1.78) |
| Tumor site               |                        |                     |                          |            |                  |
| tongue                   | 333 (39.08)            | 147 (38.58)         | 62.63                    | 0.001      | 1.00             |
| gingiva                  | 96 (11.27)             | 52 (13.65)          | 62.71                    |            | 1.09 (0.78,1.51) |
| floor of the mouth       | 53 (6.22)              | 40 (10.50)          | 52.10                    |            | 1.35 (0.95,1.91) |
| cheek lining             | 110 (12.91)            | 42 (11.02)          | 69.54                    |            | 0.85 (0.60,1.20) |
| palate                   | 62 (7.28)              | 33 (8.66)           | 65.12                    |            | 1.07 (0.73,1.56) |
| lips                     | 29 (3.40)              | 9 (2.36)            | 72.38                    |            | 1.09 (0.55,2.13) |
| oropharynx               | 27 (3.17)              | 23 (6.04)           | 43.91                    |            | 2.08 (1.34,3.23) |
| others                   | 142 (16.67)            | 35 (9.19)           | 79.31                    |            | 0.63 (0.43,0.91) |
| Clinical stage           |                        |                     |                          |            |                  |
| I                        | 136 (18.89)            | 30 (8.90)           | 79.75                    | < 0.001    | 1.00             |
| II                       | 220 (30.56)            | 78 (23.15)          | 69.95                    |            | 1.66 (1.09,2.53) |
| III                      | 109 (15.14)            | 59 (17.50)          | 57.56                    |            | 2.70 (1.74,4.19) |
| IV                       | 255 (35.41)            | 170 (50.45)         | 53.90                    |            | 2.98 (2.02,4.40) |
| Pathological grading     |                        |                     |                          |            |                  |
| well                     | 336 (49.48)            | 136 (40.36)         | 67.63                    | 0.001      | 1.00             |
| moderate                 | 272 (40.06)            | 138 (40.95)         | 63.01                    |            | 1.28 (1.01,1.62) |
| poor                     | 71 (10.46)             | 63 (18.69)          | 51.66                    |            | 1.64 (1.21,2.20) |
| Surgery                  |                        |                     |                          |            |                  |
| no                       | 58 (6.78)              | 86 (22.34)          | 14.65                    | < 0.001    | 1.00             |
| yes                      | 797 (93.22)            | 299 (77.66)         | 70.12                    |            | 0.18 (0.14,0.24) |
| Treatment                |                        |                     |                          |            |                  |
| surgery                  | 316 (39.65)            | 74 (19.22)          | 72.59                    | 0.211      | 1.00             |
| surgery + CT             | 166 (20.83)            | 70 (18.18)          | 74.22                    |            | 1.00 (0.72,1.40) |
| surgery + RT             | 111 (13.93)            | 36 (9.35)           | 72.75                    |            | 0.97 (0.65,1.44) |
| surgery + CRT            | 204 (25.59)            | 119 (30.91)         | 64.50                    |            | 1.31 (0.98,1.76) |
| Smoking status           |                        |                     |                          |            |                  |
| no                       | 596 (69.71)            | 244 (63.38)         | 65.97                    | < 0.001    | 1.00             |
| yes                      | 259 (30.29)            | 141 (36.62)         | 61.35                    |            | 1.49 (1.21,1.83) |
| Drinking status          |                        |                     |                          |            |                  |
| no                       | 692 (80.94)            | 285 (74.03)         | 66.05                    | < 0.001    | 1.00             |
| yes                      | 163 (19.06)            | 100 (25.97)         | 58.35                    |            | 1.52 (1.21,1.91) |

Abbreviations: CT, chemotherapy; RT, radiotherapy; CRT, chemoradiotherapy.

chemotherapy (CT), 147 patients (13.4%) received surgery and radiotherapy (RT), and 323 patients (29.5%) received surgery and chemoradiotherapy (CRT).

1240 oral cancer patients were followed up for 49235.00 person months and the overall survival rate for 1 year, 3 year and 5 year were 90.24%, 75.26%, and 64.38% respectively.

### Univariate analysis of potential prognosis factors in oral cancer patients

An univariate Cox regression analysis was performed to test whether the sociodemographic and clinicopathological characteristic selected was associated with survival. As shown in Table 1, gender, age, BMI,

occupation, origin, smoking, drinking, tumor site, clinical stage, histological grading, and surgery were all possible prognosis factors. Age ≥ 55 [1.52(1.23, 1.87)], BMI < 18.5 kg/m<sup>2</sup> [1.37(1.06, 1.76)], smoking [1.49(1.21, 1.83)], drinking [1.52(1.21,1.91)], advanced clinical stage [1.66 (1.09, 2.53) , 2.70 (1.74, 4.19), 2.98(2.02, 4.40) for stage II, III, IV respectively] and poorly histological differentiation [1.64(1.21, 2.20)] were all indicators of poor survival, while female [0.67 (0.54, 0.84)], office worker [0.71 (0.56,0.90)], urban area [0.77(0.62, 0.94)], and surgery [0.18 (0.14, 0.24)] were protecting factors. Compared with tongue tumor, oropharynx tumor expects a poorer prognosis [2.08(1.34, 3.23)], while other tumor sites expects a better prognosis [0.63(0.43, 0.91)].

## Stratification analysis for evaluating the effect of treatment according to clinical stage and pathological grading

In the univariate Cox regression model, surgery is a potential protective factors. However neither chemotherapy nor radiotherapy was found significantly associated with the prognosis of oral cancer. Thus we made further analysis of the effects of treatment on survival in different clinical and pathological grading separately, results of which were presented in Table 2. For oral cancer patients with earlier clinical stage (I–II), when compared with surgery alone, surgery plus chemotherapy [0.91 (0.51, 1.63)], radiotherapy [0.92(0.41, 2.06)] or chemoradiotherapy [1.48 (0.84, 2.61)] did not shown significant statistic correlation with survival, after adjusting gender, age, BMI, occupation, origin, education, drinking, smoking, and family history. Similarly, in patients with advanced clinical stage (III–IV), when compared with surgery alone, surgery combined with chemotherapy [0.84 (0.53, 1.35)] or chemoradiotherapy [0.75(0.49, 1.13)] showed no better prognosis. Only surgery combined with radiotherapy [0.57(0.33, 0.99)] showed benefit effects. With regard to pathological grading, no significant differences were observed among surgery, chemotherapy, radiotherapy or chemoradiotherapy.

## Multivariate analysis of potential prognosis factors in oral cancer patients

All potentially significant factors derived from univariate model ( $P < 0.05$ ) were incorporated into multivariate Cox proportional hazards logistic regression analyses using the stepwise backward method. As results shown in Table 3, patients with age  $\geq 55$  showed poorer overall survival [1.29(1.01, 1.61)] than age  $< 55$ , and BMI  $< 18.5$  kg/m<sup>2</sup> showed poorer overall survival [1.36(1.04, 1.76)] than BMI of 18.5–23.9 kg/m<sup>2</sup>. Clinical stage II [1.71(1.09, 2.70)], III [2.50(1.54, 4.04)] and IV [2.46(1.58, 3.84)] were associated with poorer survival compared with stage I. Poor histological differentiation [1.46(1.04, 2.06)] was also associated with worse survival. Patients with surgery exerted better survival [0.22(0.16, 0.31)] than patients without surgery, while patients from urban area had better survival [0.59(0.41, 0.83)] than rural area.

## Survival analysis

Based on the Kaplan–Meier survival analysis, the overall 5-year survival rate was 64.38%. The 5-year survival rates for stage I ( $N = 166$ ), stage II ( $N = 298$ ), stage III ( $N = 168$ ) and stage IV ( $N = 425$ ) were 79.75%, 69.95%, 57.56% and 53.90% respectively, with  $P < 0.001$  by log rank test (Figure 1A), showing that the stage was a significant prognosis factor in the survival of oral cancer.

A significant difference existed in the overall 5-year survival rate depending on histopathological differentiation. The overall 5-year survival rate was 67.63% for the well differentiated type ( $n = 472$ ), 63.01% for the moderately differentiated type ( $n = 410$ ), and 51.66% for the poorly differentiated type (134), with  $P = 0.001$  by log rank test (Figure 1B).

There was significant difference in the overall 5-year survival rate according to BMI, with 747 people belonging to BMI  $< 18.5$  kg/m<sup>2</sup>, 213 people to BMI = 18.5–23.9 kg/m<sup>2</sup>, 280 people to BMI  $\geq 24$  kg/m<sup>2</sup>. The overall 5-year survival rate decreased as BMI decreases, 77.68%, 69.29%, 61.64% for BMI  $\geq 24$  kg/m<sup>2</sup>, BMI = 18.5–23.9 kg/m<sup>2</sup>, BMI  $< 18.5$  kg/m<sup>2</sup>, with  $P = 0.006$  by log rank test (Figure 1C).

Significant differences were also found in the overall 5-year survival rate according to age ( $P < 0.001$ ), origin ( $P = 0.028$ ) and surgery ( $P < 0.001$ ), results of which were shown in Figure 1D–1F.

However, no significant differences were found among different treatments. The overall 5-year survival rate was 72.59% for the surgery group ( $n = 390$ ), 74.21% for the surgery+CT group ( $n = 236$ ), 70.99% for the surgery + RT group ( $n = 147$ ), 64.48% for the surgery +CRT group ( $n = 323$ ), with  $P = 0.211$  by log rank test result, which showed that no significant association between adjuvant treatment and survival rate (Figure 1G).

## DISCUSSION

Oral cancer is a disease strongly influenced by social factors [5, 7, 9]. Previous studies have demonstrated that the illness process is treated differently in the population with a lower level of education and income. This has led some authors to consider oral cancer as a disease that is characteristic of people with a low economic and educational level. In Brazil, patients with a lower income and education level had a higher mortality rate due to oral cancer [6]. Similar results were found in a study in Taiwan [9]. In this sample, univariate analysis found that office worker, origin of urban area were protective factors. In further analysis, patients of origin were of significance in the multiple Cox regression model, which indicating that patients with high economic levels have better prognosis and socioeconomic factors may have a strong influence on the delayed diagnosis and choice of treatment. However, we did not find education is related to survival in this population.

Several epidemiologic studies in different head and neck sites have examined the association between alcohol consumption and smoking prediagnosis and survival with conflicting results[10–13]. A multicenter population-based case–control study of laryngeal and hypopharyngeal cancer carried out in six European regions, reported that alcohol drinking affects the survival, albeit to a limited extent [14]. Stefania Boccia [15] stated that cigarette smoking was a negative prognostic factor for those current smokers before diagnosis of oral cavity cancer, and

**Table 2: Stratification analysis for evaluating the effect of treatment on survival [HR (95% CI)]**

| Treatment     | Clinical stage <sup>a</sup> |                  | Pathological grading <sup>b</sup> |                 |                  |
|---------------|-----------------------------|------------------|-----------------------------------|-----------------|------------------|
|               | I-II                        | III-IV           | well                              | moderately      | poorly           |
| surgery       | 1.00                        | 1.00             | 1.00                              | 1.00            | 1.00             |
| surgery + CT  | 0.91 (0.51,1.63)            | 0.84 (0.53,1.35) | 0.72(0.39,0.43)                   | 0.87(0.50,1.49) | 1.70(0.59,4.89)  |
| surgery + RT  | 0.92(0.41,2.06)             | 0.57(0.33,0.99)  | 0.88(0.43,1.81)                   | 0.63(0.32,1.25) | 0.833(0.23,3.03) |
| surgery + CRT | 1.48 (0.84,2.61)            | 0.75(0.49,1.13)  | 1.14(0.67,1.95)                   | 0.71(0.42,1.19) | 1.51 (0.62,3.74) |

<sup>a</sup>Adjusted for gender, age, BMI, occupation, origin, education, drinking, smoking, family history, pathological grading.

<sup>b</sup>Adjusted for gender, age, BMI, occupation, living area, education, drinking, smoking, family history, clinical stage.

Abbreviation: CT, chemotherapy; RT, radiotherapy; CRT, chemoradiotherapy.

**Table 3: Results of multivariate analysis of prognostic factors for survival in oral cancer**

| Variable                      | Overall survival |           |         |
|-------------------------------|------------------|-----------|---------|
|                               | HR               | 95%CI     | P       |
| Age (≥ 55 vs < 55 )           | 1.29             | 1.01–1.61 | 0.041   |
| Origin (Urban vs rural area ) | 0.59             | 0.41–0.83 | 0.003   |
| Surgery (yes vs no)           | 0.22             | 0.16–0.31 | < 0.001 |
| Clinical stage                |                  |           |         |
| I                             | 1.00             |           |         |
| II                            | 1.71             | 1.09–2.70 | 0.021   |
| III                           | 2.50             | 1.54–4.04 | < 0.001 |
| IV                            | 2.46             | 1.58–3.84 | < 0.001 |
| Pathological grading          |                  |           |         |
| well                          | 1.00             |           |         |
| moderately                    | 1.11             | 0.86–1.43 | 0.421   |
| poor                          | 1.46             | 1.04-2.06 | 0.029   |
| BMI (kg/m <sup>2</sup> )      |                  |           |         |
| 18.5–23.9                     | 1.00             |           |         |
| < 18.5                        | 1.36             | 1.04-1.76 | 0.036   |
| ≥ 24                          | 0.96             | 0.72–1.34 | 0.842   |

excessive alcohol use was associated with an increased hazard of overall survival. However, more recent studies that have examined the effect of alcohol drinking and smoking on survival reported opposite results [10, 11, 13]. In our study, univariate analysis showed that both drinking and smoking at diagnosis predict poor survival. However, these patterns did not persist after adjustment for significant prognostic factors in a multivariate model.

For a long time, obesity has been thought to be a preoperative risk factor for surgery due to its association with numerous complications, such as cardiovascular, pulmonary and metabolic disorders, which may result in increased postoperative morbidity [16]. However, previous authors have shown that obesity may be correlated with a favorable long-term prognosis in gastric cancer, head and neck cancer, breast cancer et al. [17–20]. Although a high BMI has been thought to be associated with a poorer short-term outcome than a low BMI due to simplicity and steadiness of surgical procedure in gastric cancer [21], the prognostic implications in oral cancer are unknown. In Our

study, we showed that prognosis of the overweight patients was better than that of the normal- and low-BMI groups, even though the comparison between the normal- and high-BMI groups did not reach statistical significance. Multivariate analysis showed that a low BMI was an independent predictor of a poor prognosis. It is well known that patients with advanced cancer experience weight loss and poor nutrition, especially for oral cancer patients. Cancer lesions in the oral area may cause dysphagia, odynophagia, or alteration of taste and appetite, leading to a reduction of overall caloric intake and weight loss. Moreover, patients with adjuvant therapy are usually suffered from severe side effects, so low BMI patients are easily to be suffer from malnutrition, thus expecting worse prognosis. However, we did not find difference between normal- and high-BMI groups, probably because of the limited number of patients with extremely high BMI in a Chinese population. In fact, only 42 (3.4%) patients are with a BMI ≥ 28 kg/m<sup>2</sup> in the study, so the data may not be sufficient enough to reveal the association between obesity and prognosis.

For the treatment of oral cancer, it is still controversial. Usually, surgical treatment is preferred in the initial oral cancer, and the cases of progressed oral cancer with cervical lymph node metastasis can be provided with surgical treatment along with chemotherapy

and radiation therapy [22]. Previous studies reported that overall survival and disease-specific survival was significantly higher in the surgically treated group compared with no surgery group in oral cavity squamous cell carcinoma [23–25]. Surgery and/or radiation therapy

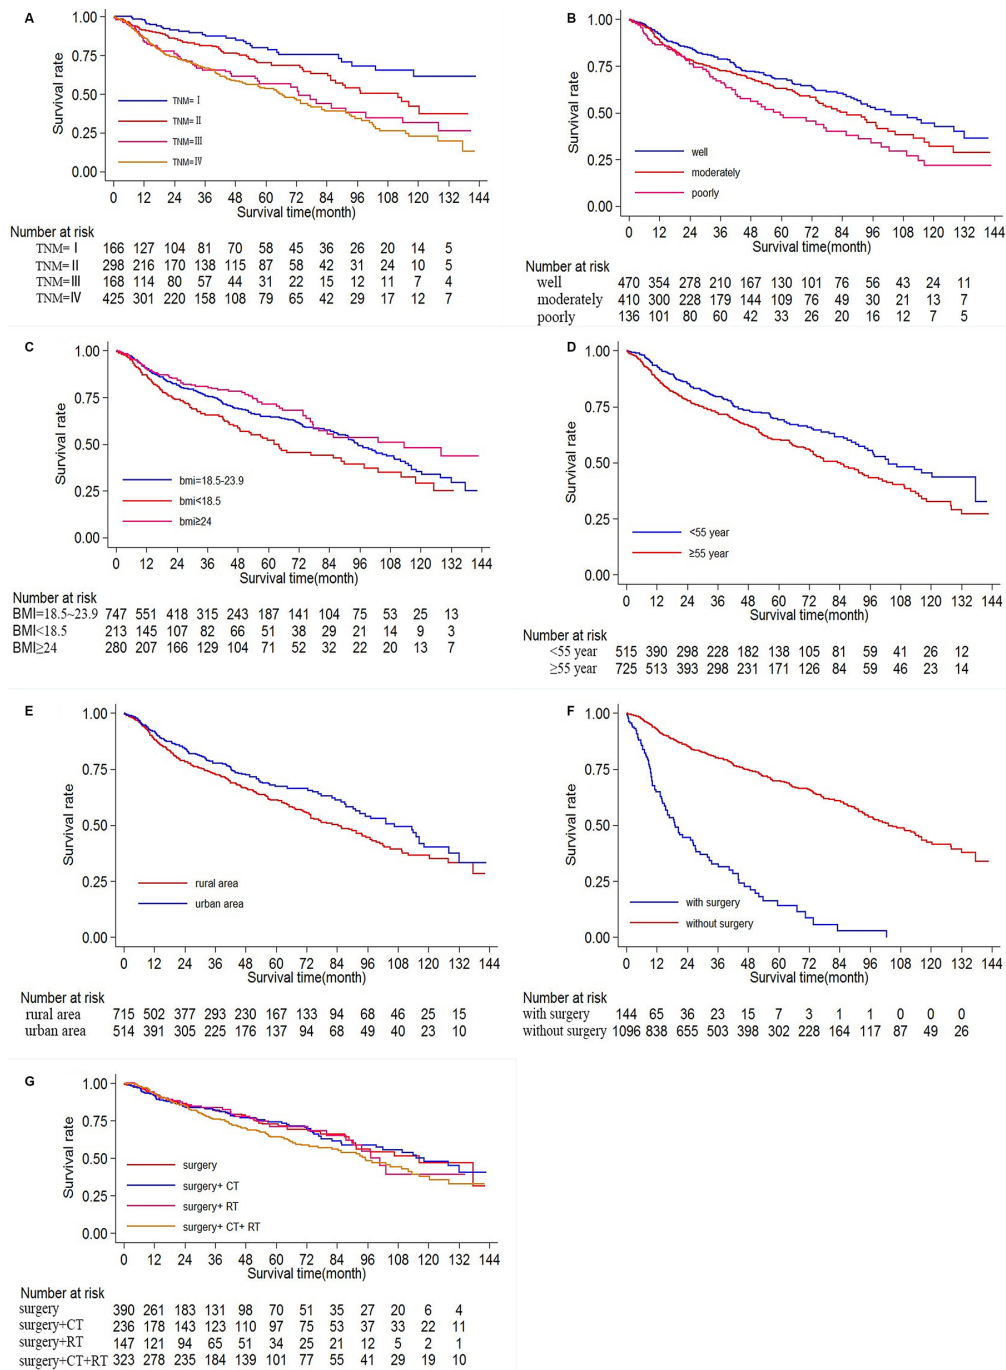

**Figure 1: Ten-year survival of patients diagnosed with oral cancer in The First Affiliated Hospital of Fujian Medical University (Long-rank Mantel–Cox test).** (A) Survival analysis according to clinical stage (stage I, II, III, IV),  $P < 0.001$  by log rank test. (B) Survival analysis according to histological grade (poorly, moderately and well differentiated),  $P = 0.001$ . (C) Survival analysis according to BMI ( $< 18.5, 18.5-23.9, \geq 24$  kg/m<sup>2</sup>),  $P = 0.006$ . (D) Survival analysis according to age ( $< 55, \geq 55$  years old),  $P < 0.001$ . (E) Survival analysis according to origin (rural area, urban area),  $P = 0.028$ . (F) Survival analysis according to surgery (with or without surgery),  $P < 0.001$ . (G) Survival analysis according to treatment (surgery alone, surgery + chemotherapy, surgery + radiotherapy, surgery + chemoradiotherapy), and  $P = 0.211$ .

provides disease-specific survival benefit as compared with no therapy within the head and neck region [26]. On the other hand, some other studies indicated that radiotherapy plays an important role in the local control of small volume tumors, such as those of the T1–2 category [27–29], in head and neck squamous cell carcinoma. However, the efficacy of radiation therapy alone was shown to be reduced in cases of T3–4 category tumors. Addition of adjuvant radiotherapy to surgery did not significantly alter the 5-year local control rate or the overall survival rate in oral cavity squamous cell carcinoma patients with pT1–3N0 disease [30]. In our study we observed that patients underwent surgery had better survival than patients without, while combined with radiotherapy showed benefit effects in oral cancer patients of advanced clinical stage III-IV.

As for chemotherapy, it is usually applied to advanced stage, extracapsular spread, recurrence or metastasis. A main meta-analysis showed only a small significant survival benefit in favour of chemotherapy, so the routine use of chemotherapy is debatable [31]. Studies about oral cancer also showed that combination therapy with chemotherapy after surgical treatment is not significantly better than those who received only surgical treatment or surgery plus radiotherapy [23]. Results from this study suggest that surgery combined with chemotherapy or concurrent chemoradiotherapy may not be significantly associated with overall survival of oral cancer after adjusting for the effect of gender, age, BMI, occupation, origin, education, drinking, smoking, family history, clinical stage, pathological grading. One of the possible reasons for the controversial result about adjuvant therapy is that the use of adjuvant therapy is varied in different study population, for example, the agents, dose and cycles used for chemotherapy, as well as the dose and delivering for radiotherapy. Besides, sensitivity to adjuvant therapy may also differed from population to population. Another possible reason is that most patients with advanced oral cancer were administered with adjuvant therapy, data about patients without adjuvant therapy is limited, thus the potential benefit of adjuvant therapy may be unrevealed.

## MATERIALS AND METHODS

### Study subjects

Oral cancer patients were consecutively recruited from The First Affiliated Hospital of Fujian Medical University, within a period from January 2004 to December 2015. The inclusion criteria were as follows: 1) all cases were newly diagnosed primary oral cancer patients with histological confirmation; 2) all cases are Chinese Han population and reside in Fujian Province; 3) all cases were aged 20–80 years old. Exclusion criteria included recurrent oral cancer, metastasized cancer, previous chemotherapy or radiotherapy”. More than

90% oral cancer patients seen at Hospital consented to participate in our study. Initially 1377 patients were recruited, and 137 patients were excluded according to the inclusion/exclusion criteria”. So finally 1240 patients were included and were followed for up to 10 years, 110 patients were lost during the follow-up process.

The present study was approved by the Institutional Review Board (IRB) of Fujian Medical University, and has been performed in line with the ethical standards laid down in the 1964 Declaration of Helsinki and its later amendments. Informed consent was obtained from all individual participants included in the study.

### Methods

Sociodemographic information and lifestyle histories of patients were obtained at baseline by trained interviewers through the use of a standardized questionnaire. The subjects were considered smokers if they had smoked at least 100 cigarettes during their lifetime, and those who had consumed at least 1 drink/week for at least 6 months continuously were considered alcohol drinkers [32]. BMI values were categorized according to the Chinese definitions (< 18.5, 18.5–23.9, ≥ 24.0 kg/m<sup>2</sup>).

### Surgical treatment

Guidelines for surgery were in accordance with the recommendations of National Comprehensive Cancer Network, USA, Tumors were widely excised with > 1.5 cm safety margins (both peripheral and deep margins). Classic radical or modified neck dissections of levels I to V were performed in patients with clinically positive nodal disease. Supraomohyoid neck dissection of levels I to III was carried out in all patients with clinically negative necks in CT or MRI. Bilateral neck dissections were done when the primary tumor contacted or crossed the midline. Surgical defects were repaired with primary closure and local or vascularized free flaps.

### Postoperative radiotherapy/chemotherapy

Excluding those with poor general condition or unwilling to comply, Postoperative RT or concurrent chemoradiotherapy (CRT) was performed in patients with at least one of the following conditions: (1) a positive resection margin; (2) perineural invasion; (3) lymphovascular invasion; (4) ≥ 2 pathologically positive nodes; and (5) extracapsular extension of cervical nodes. RT or concurrent CRT was scheduled within 4 to 6 weeks after the operation.

As for radiation, the technique of 3D conformal RT or intensity modulated RT was used, with a linear accelerator using 6 to 10 MV X-ray to cover the surgical field with 1- to 2-cm margins and regional cervical lymphatics. For 3D conformal RT, the patients were initially treated with wedged-field technique to spare the

contra lateral parotid and neck. The field covered the primary tumor and neck with a conventional fractionation of 2 Gy per fraction, 5 consecutive fractions per week for 44 to 50 Gy. Subsequently, the radiation field was narrowed down and focused on the primary tumor and metastatic neck to boost to a total dose of 60 to 66 Gy. For intensity modulated RT, dose painting with simultaneous integrated boost technique was applied. A total dose of 60 to 66 Gy were prescribed in 30 to 33 fractions with conventional fractionation. The beam angle was carefully selected to reduce the irradiation of the contralateral parotid and neck.

As for chemotherapy, oxaliplatin combined with paclitaxel or with 5-fluorouracil was used with the following dosage: oxaliplatin 130 mg/m<sup>2</sup>, paclitaxel 175 mg/m<sup>2</sup>, Q3W for 2 courses; oxaliplatin 130 mg/m<sup>2</sup>, 5-fluorouracil 450 mg/m<sup>2</sup> Q2W for 3–6 courses.

### Follow-up

Follow-up data were obtained by phone, outpatient visits and our clinical database. Follow-up of all patients was carried out according to our standard protocol (every six months for at least 2 years, every twelve months for the next 3 years, and after 5 years every 24 months for life). The median follow-up time was 72 months for all patients. Overall survival rate was calculated from the date of diagnosis to the date of death from any cause or the date of the last follow-up observation. Data were censored at the date of death from causes not related to oral cancer or at the date of last follow-up.

### Statistical assessment

Potential prognostic factors included in the study was firstly analyzed by univariate Cox regression and then further tested by multivariate cox regression analysis with hazard ratio (HR) and 95% confidence intervals (CIs) calculated. Stratified analyses by potential effect modifiers were performed with adjusted Cox regression model. The survival rate was calculated using the Kaplan Meier method, and the log rank test was performed for significance test of the predicted prognosis factors. All analysis were performed using Statistical significance was considered at  $P < 0.05$ .

### ACKNOWLEDGMENTS

We are grateful to the subjects participated in the study. We thank for the staff members of The First Affiliated Hospital of Fujian Medical University for contributing to the collection of data.

### CONFLICTS OF INTEREST

We declare that we have no financial and personal relationships with other people or organizations that can inappropriately influence our work, there is no

professional or other personal interest of any nature or kind in any product, service and/or company that could be construed as influencing the position presented in, or the review of, the manuscript entitled.

### GRANT SUPPORT

This study was funded by grants from Natural Science Foundation of Fujian Province (No. 2015J01304), the Provincial Colleges and Universities Program of Science and Technology Department of Fujian Province (No. JK2015017), and the Special Funding Project for Local Colleges and Universities from the Central Financial (No. 100303900130).

### REFERENCES

1. Siegel R, Naishadham D, Jemal A. Cancer statistics, 2013. *CA Cancer J Clin.* 2013; 63:11–30.
2. Zhang SK, Zheng R, Chen Q, Zhang S, Sun X, Chen W. Oral cancer incidence and mortality in China, 2011. *Chin J Cancer Res.* 2015; 27:44–51.
3. Saba NF, Goodman M, Ward K., Flowers C, Ramalingam S, Owonikoko T, Chen A, Grist W, Wadsworth T, Beitler JJ, Khuri FR, Shin DM. Gender and ethnic disparities in incidence and survival of squamous cell carcinoma of the oral tongue, base of tongue, and tonsils: a surveillance, epidemiology and end results program-based analysis. *Oncology.* 2011; 81:12–20.
4. McDonald JT, Johnson-Obaseki S, Hwang E, Connell C, Corsten M. The relationship between survival and socioeconomic status for head and neck cancer in Canada. *J Otolaryngol Head Neck Surg.* 2014; 43:2.
5. Madani AH, Dikshit M, Bhaduri D, Jahromi AS, Aghamolaei T. Relationship between Selected Socio-Demographic Factors and Cancer of Oral Cavity - A Case Control Study. *Cancer Inform.* 2010; 9:163–168.
6. Dantas TS, de Barros Silva PG, Sousa EF, da Cunha Mdo P, de Aguiar AS, Costa FW, Mota MR, Alves AP, Sousa FB. Influence of Educational Level, Stage, and Histological Type on Survival of Oral Cancer in a Brazilian Population: A Retrospective Study of 10 Years Observation. *Medicine (Baltimore).* 2016; 95:e2314.
7. Conway DI, Petticrew M, Marlborough H, Berthiller J, Hashibe M, Macpherson LM. Socioeconomic inequalities and oral cancer risk: a systematic review and meta-analysis of case-control studies. *Int J Cancer.* 2008; 122:2811–2819.
8. Guo Y, Logan HL, Marks JG, Shenkman EA. The relationships among individual and regional smoking, socioeconomic status, and oral and pharyngeal cancer survival: a mediation analysis. *Cancer Med.* 2015; 4:1612–1619.
9. Wong YK, Tsai WC, Lin JC, Poon CK, Chao SY, Hsiao YL, Chan MY, Cheng CS, Wang CC, Wang CP, Liu SA. Socio-demographic factors in the prognosis of oral cancer patients. *Oral Oncol.* 2006; 42:893–906.

10. Kawakita D, Hosono S, Ito H, Oze I, Watanabe M, Hanai N, Hasegawa Y, Tajima K, Murakami S, Tanaka H, Matsuo K. Impact of smoking status on clinical outcome in oral cavity cancer patients. *Oral Oncol.* 2012; 48:186–191.
11. Duffy SA, Ronis DL, McLean S, Fowler KE, Gruber SB, Wolf GT, Terrell JE. Pretreatment health behaviors predict survival among patients with head and neck squamous cell carcinoma. *J Clin Oncol.* 2009; 27:1969–1975.
12. Sterba KR, Garrett-Mayer E., Carpenter MJ, Tooze JA, Hatcher JL, Sullivan C, Tetrick LA, Warren GW, Day TA, Alberg AJ, Weaver KE. Smoking status and symptom burden in surgical head and neck cancer patients. *Laryngoscope.* 2016.
13. Walter V, Jansen L, Ulrich A, Roth W, Blaker H, Chang-Claude J, Hoffmeister M, Brenner H. Alcohol consumption and survival of colorectal cancer patients: a population-based study from Germany. *Am J Clin Nutr.* 2016; 103:1497–1506.
14. Dikshit RP, Boffetta P, Bouchardy C, Merletti F, Crosignani P, Cuchi T, Ardanaz E, Brennan P. Lifestyle habits as prognostic factors in survival of laryngeal and hypopharyngeal cancer: a multicentric European study. *Int J Cancer.* 2005; 117:992–995.
15. Leoncini E, Vukovic V, Cadoni G, Pastorino R, Arzani D, Bosetti C, Canova C, Garavello W, La Vecchia C, Maule M, Petrelli L, Pira E, Polesel J, et al. Clinical features and prognostic factors in patients with head and neck cancer: Results from a multicentric study. *Cancer Epidemiol.* 2015; 39:367–374.
16. Kulig J, Sierzega M, Kolodziejczyk P, Dadan J, Drews M, Fraczek M, Jezierski A, Krawczyk M, Starzynska T, Wallner G, Polish Gastric Cancer Study G. Implications of overweight in gastric cancer: A multicenter study in a Western patient population. *Eur J Surg Oncol.* 2010; 36:969–976.
17. Wada T, Kunisaki C, Ono HA, Makino H, Akiyama H, Endo I. Implications of BMI for the Prognosis of Gastric Cancer among the Japanese Population. *Dig Surg.* 2015; 32:480–486.
18. Gaudet MM, Olshan AF, Chuang SC, Berthiller J, Zhang ZF, Lissowska J, Zaridze D, Winn DM, Wei Q, Talamini R, Szeszenia-Dabrowska N, Sturgis EM, Schwartz SM, et al. Body mass index and risk of head and neck cancer in a pooled analysis of case-control studies in the International Head and Neck Cancer Epidemiology (INHANCE) Consortium. *Int J Epidemiol.* 2010; 39:1091–1102.
19. Crispo A, Grimaldi M, D’Aiuto M, Rinaldo M, Capasso I, Amore A, D’Aiuto G, Giudice A, Ciliberto G, Montella M. BMI and breast cancer prognosis benefit: mammography screening reveals differences between normal weight and overweight women. *Breast.* 2015; 24:86–89.
20. Tokunaga M, Hiki N, Fukunaga T, Ohyama S, Yamaguchi T, Nakajima T. Better 5-year survival rate following curative gastrectomy in overweight patients. *Ann Surg Oncol.* 2009; 16:3245–3251.
21. Wu XS, Wu WG, Li ML, Yang JH, Ding QC, Zhang L, Mu JS, Gu J, Dong P, Lu JH, Liu YB. Impact of being overweight on the surgical outcomes of patients with gastric cancer: a meta-analysis. *World J Gastroenterol.* 2013; 19:4596–4606.
22. Omura K. Current status of oral cancer treatment strategies: surgical treatments for oral squamous cell carcinoma. *Int J Clin Oncol.* 2014; 19:423–430.
23. Gore SM, Crombie AK, Batstone MD, Clark JR. Concurrent chemoradiotherapy compared with surgery and adjuvant radiotherapy for oral cavity squamous cell carcinoma. *Head Neck.* 2015; 37:518–523.
24. Lim YC, Choi EC. Surgery alone for squamous cell carcinoma of the oral cavity: survival rates, recurrence patterns, and salvage treatment. *Acta Otolaryngol.* 2008; 128:1132–1137.
25. Liu CH, Chen HJ, Wang PC, Chen HS, Chang YL. Patterns of recurrence and second primary tumors in oral squamous cell carcinoma treated with surgery alone. *Kaohsiung J Med Sci.* 2013; 29:554–559.
26. Patel TD, Marchiano E, Chin OY, Kilic S, Eloy JA, Baredes S, Park RC. Utility of Surgery/Radiotherapy in Distant Metastatic Head and Neck Squamous Cell Carcinoma: A Population-Based Approach. *Otolaryngol Head Neck Surg.* 2016; 154:868–874.
27. Frata P, Cellai E, Magrini SM, Bonetti B, Vitali E, Tonoli S, Buglione M, Paiar F, Barca R, Fondelli S, Polli C, Livi L, Biti G. Radical radiotherapy for early glottic cancer: Results in a series of 1087 patients from two Italian radiation oncology centers. II. The case of T2N0 disease. *Int J Radiat Oncol Biol Phys.* 2005; 63:1387–1394.
28. Fein DA, Mendenhall WM, Parsons JT, Million RR. T1-T2 squamous cell carcinoma of the glottic larynx treated with radiotherapy: a multivariate analysis of variables potentially influencing local control. *Int J Radiat Oncol Biol Phys.* 1993; 25:605–611.
29. Magge KT, Myers EN, Johnson JT. Radiation following surgery for oral cancer: impact on local control. *Laryngoscope.* 2003; 113:933–935.
30. Liao CT, Chang JT, Wang HM, Ng SH, Hsueh C, Lee LY, Lin CH, Chen IH, Huang SF, Cheng AJ, See LC, Yen TC. Does adjuvant radiation therapy improve outcomes in pT1–3N0 oral cavity cancer with tumor-free margins and perineural invasion? *Int J Radiat Oncol Biol Phys.* 2008; 71:371–376.
31. Pignon JP, Bourhis J, Domenge C, Designe L. Chemotherapy added to locoregional treatment for head and neck squamous-cell carcinoma: three meta-analyses of updated individual data. MACH-NC Collaborative Group. Meta-Analysis of Chemotherapy on Head and Neck Cancer. *Lancet.* 2000; 355:949–955.
32. Chen F, He B, Hu Z. Passive smoking and cooking oil fumes (COF) may modify the association between tea consumption and oral cancer in Chinese women. *J Cancer Res Clin Oncol.* 2016; 142:995–1001.
